# Supplementary material for: Akt Inhibition Promotes Autophagy and Clearance of Group B Streptococcus from the Alveolar Epithelium
Source: MDPI journal article supplement (doi:10.3390/pathogens11101134), 2022-09-30
Supplement: s1 [file s1]

## Supplementary Material

**Supplementary Table S1.** Primer sequences used in this study.

| Gene         |         | Sequence (5'-3')           |
|--------------|---------|----------------------------|
| IL8          | Forward | TGTGAAGGTGCAGTTTGGCC       |
|              | Reverse | CACCCAGTTTTCCTTGGGGT       |
| CCL2         | Forward | GCTCAGCCAGATGCAATCAA       |
|              | Reverse | TGAACCCACTTCTGCTTGGG       |
| CCL5         | Forward | CCAGCAGTCGTCCACAGGT        |
|              | Reverse | ACACTTGGCGGTTCTTTGGG       |
| ATG5         | Forward | TGACGTTGGTAACTGACAAAGT     |
|              | Reverse | AATGCCATTTTCAG-TGGTGTG     |
| CFTR         | Forward | AAAAGGCCAGCGTTGTCTCC       |
|              | Reverse | GCTCTCTATCCCATTCTCTTTCCA   |
| SP-A         | Forward | CATGGGTCCACCTGGAGAAA       |
|              | Reverse | AAAGTCGTGGAGTGTGGCTT       |
| SP-B         | Forward | AAGCCATGATTCCCAAGGGTG      |
|              | Reverse | CATTCTCCTGTCGGCGACCT       |
| SP-C         | Forward | GAGCCAGAAACACACGGAGA       |
|              | Reverse | GTGAGAGCCTCAAGACTGGG       |
| SP-D         | Forward | ATTGAAGGGGGACAAAGGCAT      |
|              | Reverse | ATTTGGGAAGAGCTCAACTTTCTTA  |
| INF $\alpha$ | Forward | GGAGGAGAGGGTGGGAGAAA       |
|              | Reverse | GACAACCTCCCAGGCACAAG       |
| IL1- $\beta$ | Forward | CGGACCCCAAAGATGAAGGGCTG    |
|              | Reverse | GCTCTTGTTGATGTGCTGCTGCGAG  |
| IL6          | Forward | GTCAGGGGTGGTTATTGCAT       |
|              | Reverse | AGTGAGGAACAAGCCAGAGC       |
| GAPDH        | Forward | GGAAGGTGAAGGTCGGAGTCA      |
|              | Reverse | GTCATT-GATGGCAACAATATCCACT |

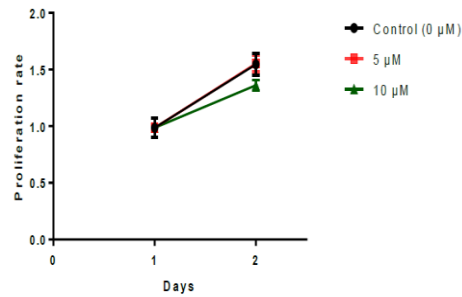

**Supplementary Figure S1. Effect of Akt inhibition on alveolar epithelial cell proliferation.** Cell proliferation was determined using MTT assay in A549 treated with MK2206 (5, 10  $\mu$ M). Higher concentration of MK2206 (10 $\mu$ M) negatively impacts cell proliferation.

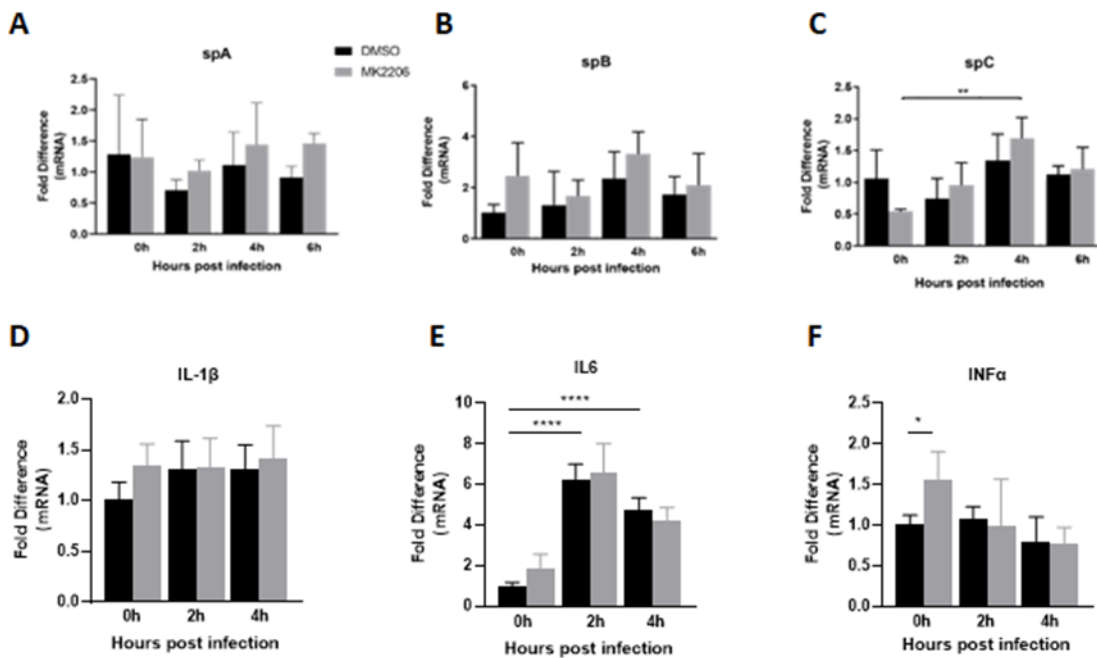

**Supplemental Figure S2. Suppression of p-Akt *in vivo* by MK-2206 treatment.** A, Representative western blot analysis of Akt phosphorylated levels in mice with GBS pneumonia that were treated with MK-2206 compared to sham. Data are illustrated as bars, and plotted as median with range and statistical analysis was performed with Mann-Whitney (n=4). \*p < 0.05.

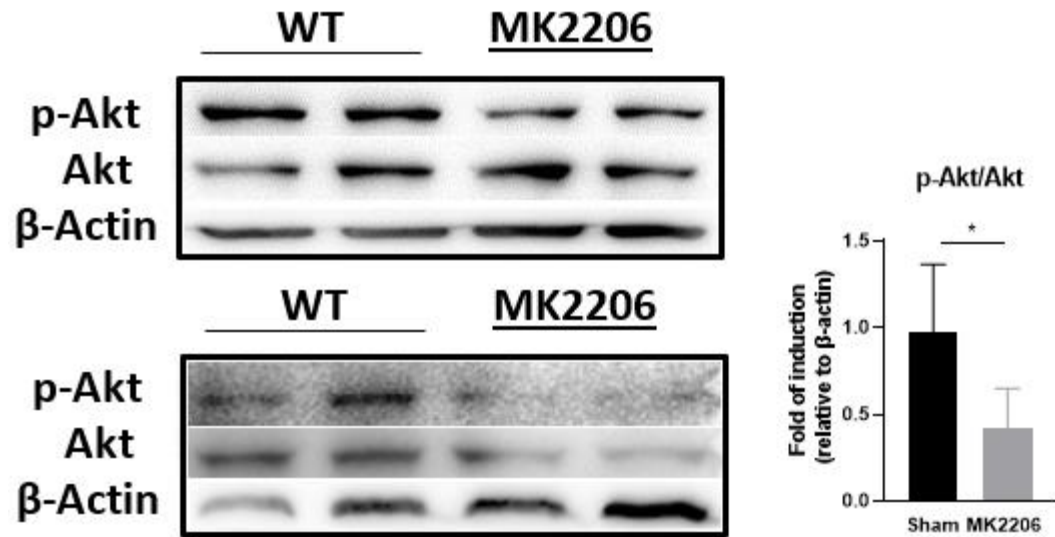

**Supplementary Figure S3. Expression of surfactants by A549 epithelial cells upon GBS infection and Ak inhibition.** A549 cells were treated with MK2206 or sham for 24 hours and infected with GBS for 2 hours. Expression (mRNA) of the surfactant proteins sp-A, sp-B and sp-C (A, B, C), and IL-1 $\beta$ , IL6 and INF $\alpha$  (D, E, F) upon pre-treatment with MK2206 and GBS infection was observed. Data are illustrated as bars, plotted as mean  $\pm$  S.D and statistical analysis performed using One-Way ANOVA. \* $p < 0.05$ , \*\* $p < 0.01$ , \*\*\*\* $p < 0.0001$ .
